# Supplementary material
Source: PubMed Central journal article supplement (PMC7126448)
Supplement: mmc1.pdf [file mmc1.pdf]

© American Dairy Science Association, 2009.

*Journal of Dairy Science* Interpretive Summary  
October 2009 (92:5139–5146)

**Respiratory infections in Norwegian dairy calves.** *By Gulliksen et al., page 5139.* The frequency and severity of bovine respiratory infections have increased globally. Respiratory disease is currently regarded as the principal health problem and the most economically important disease in calves. The current study indicates that respiratory viruses are widespread in Norwegian dairy cattle. Herd size and environmental factors, such as colostrum management and contact with cows and older calves, have a significant influence on the development and severity of respiratory disease.
